# Supplementary material for: Online Support Groups for Family Caregivers: Scoping Review
Source: PubMed Central journal article supplement (PMC10753418; doi:10.2196/46858), 2023-12-13
Supplement: jmir_v25i1e46858_app3.pdf [file jmir_v25i1e46858_app3.pdf]

**Table S1**

Data Extraction Table: Articles included in review.

| Paper                                                                                                     | Title                                                                                                                                                                          | Year | Location     | Research Methodology                        | Theoretical Approach                                | Types of Family Caregiver                            |
|-----------------------------------------------------------------------------------------------------------|--------------------------------------------------------------------------------------------------------------------------------------------------------------------------------|------|--------------|---------------------------------------------|-----------------------------------------------------|------------------------------------------------------|
| Andersson, S., Erlingsson, C., Magnusson, L., Hanson, E.                                                  | The experiences of working carers of older people regarding access to a web-based family care support network offered by a municipality                                        | 2017 | Sweden       | Qualitative                                 | None specified                                      | Working caregivers of older people                   |
| Andréasson, F., Andreasson, J. & Hanson, E.                                                               | Developing a carer identity and negotiating everyday life through social networking sites: an explorative study on identity constructions in an online Swedish carer community | 2017 | Sweden       | Qualitative                                 | Constructionist approach                            | All adult family caregivers                          |
| Benson, J., Parker Oliver, D., Washington, K.T., Rolbeicki, A., Lombardo, C.B., Garza, J.E., Demiris, G.+ | Online social support groups for informal caregivers of hospice patients with cancer                                                                                           | 2020 | USA          | Mixed methods with concurrent nested design | Berbee et al (1993) Social support activation model | Caregivers of hospice cancer patients                |
| Clifford, T., & Minnes, P.                                                                                | Logging On: Evaluating an online support group for parents of children with ASD                                                                                                | 2012 | USA          | Quantitative                                | Stress buffering model (Cohen & Wills, 1985)        | Parents of children with Autism Spectrum Disorder    |
| Cole, L., Kharwa, Y., Khumalo, N., Reinke, J. & Karrim, S.                                                | Caregivers of School-aged Children with Autism: Social Media as a Source of Support                                                                                            | 2017 | South Africa | Qualitative                                 | Not stated                                          | Caregivers of children with Autism Spectrum Disorder |

|                                                                                                         |                                                                                                                   |      |            |              |                                                      |                                                                   |
|---------------------------------------------------------------------------------------------------------|-------------------------------------------------------------------------------------------------------------------|------|------------|--------------|------------------------------------------------------|-------------------------------------------------------------------|
| Coulson, N.S. & Greenwood, N.                                                                           | Families affected by childhood cancer: an analysis of the provision of social support within online support group | 2012 | UK and USA | Qualitative  | Cutrona & Suhr Social support scale (1992)           | Families affected by childhood cancer                             |
| Diefenbeck, C.A., Klemm, P.R., Hayes E.R.                                                               | Emergence of Yalom's Therapeutic Factors in a Peer-Led, Asynchronous, Online Support Group for Family Caregivers  | 2014 | USA        | Qualitative  | Yalom's Therapeutic Factors                          | Caregivers of chronically ill individuals                         |
| Ferrell, E.L., Russin, S.E., & Hardy, R.M.                                                              | Informal caregiving experiences in posttraumatic stress disorder: A content analysis of an online community       | 2018 | USA        | Qualitative  | Transactional stress theory; Caregiver stress theory | Caregivers of people with PTSD                                    |
| Friedman, E., Trail, T., Vaughan, C.A. & Tanielian, T.*                                                 | Online peer support groups for family caregivers: are they reaching the caregivers with the greatest needs?       | 2018 | USA        | Quantitative | None stated                                          | Caregivers of military personnel                                  |
| Ihring, A., Renner, T., Muck, T., Maatz, P., Borkowetz, A., Keck, B., Maatouk., Wirth, M. P., Huber, J. | Online support groups offer low-threshold backing for family and friends of patients with prostate cancer         | 2018 | Germany    | Quantitative | None stated                                          | Caregivers of people with prostate cancer                         |
| Knepper, K. & and Arrington, M.                                                                         | Parents' Narratives in an Online PHPV Forum: Toward a Typology of Caregiver Illness Narratives                    | 2016 | USA        | Qualitative  | Frank's Typology of Illness narratives               | Parents of children with Persistent Hyperplastic Primary Vitreous |

|                                                                 |                                                                                                                                                   |      |               |               |                                                                                 |                                                    |
|-----------------------------------------------------------------|---------------------------------------------------------------------------------------------------------------------------------------------------|------|---------------|---------------|---------------------------------------------------------------------------------|----------------------------------------------------|
| Kruk, B.                                                        | 'I can't bear the thought that he might not recognise me': Personal narratives as a site of identity work in the online Alzheimer's support group | 2015 | UK            | Qualitative   | Conversation analysis and membership categorization analysis                    | Caregivers of people with Alzheimer's Disease      |
| Male, D.A., Fergus, K.D., Stephen, J.E.                         | The Continuous Confrontation of Caregiving as Described in Real-Time Online Group Chat                                                            | 2015 | Canada        | Qualitative   | Grounded theory                                                                 | Caregivers of people with cancer                   |
| McKechnie, V., Barker, C., & Stott, J.                          | The Effectiveness of an Internet Support Forum for Carers of People With Dementia: A Pre-Post Cohort Study                                        | 2014 | UK            | Mixed methods | None stated                                                                     | Caregivers of people with dementia                 |
| Mohd Roffeei, S. H. M., Abdullah, N., & Basar, S. K. R.         | Seeking social support on Facebook for children with Autism Spectrum Disorders (ASDs)                                                             | 2015 | Malaysia      | Qualitative   | Social support behaviour code                                                   | Parents of children with Autism Spectrum Disorders |
| Oprescu, F., Campo, S., Lowe, J., Andsager, J., Morcuende, J.A, | Online Information Exchanges for Parents of Children With a Rare Health Condition: Key Findings From an Online Support Community                  | 2013 | Not specified | Qualitative   | Uncertainty Management Theory and Brashers information seeking behaviour scheme | Parents of children with clubfoot                  |
| Trail, T., Friendman, E., Rutter, C., & Tanielian, T.*          | The Relationship Between Engagement in Online Support Groups and Social Isolation Among Military Caregivers: Longitudinal Questionnaire Study     | 2020 | USA           | Quantitative  | None stated                                                                     | Caregivers of military personnel                   |

|                                                                                                                 |                                                                                                                                                          |      |               |                                     |                                                                    |                                    |
|-----------------------------------------------------------------------------------------------------------------|----------------------------------------------------------------------------------------------------------------------------------------------------------|------|---------------|-------------------------------------|--------------------------------------------------------------------|------------------------------------|
| Washington, K., Parker Oliver, D., Benson, J., Rolbiecki, A., + Jorgensen, L., Cruz-Oliver, D., & Demiris, G. + | Factors influencing engagement in an online support group for family caregivers of individuals with advanced cancer                                      | 2018 | USA           | Secondary Qualitative Data Analysis | Context, content, delivery framework (Perski et al, 2014)          | Caregivers of people with cancer   |
| Yoo, J. H., Jang, S., & Choi, T.                                                                                | Sociocultural Determinants of Negative Emotions Among Dementia Caregivers in the United States and in Korea: A Content Analysis of Online Support Groups | 2010 | Korea and USA | Mixed methods                       | Uses and gratification model of communication media (Weiser, 2001) | Caregivers of people with dementia |

**Note:**

+ These studies used the data from the same randomized pragmatic trial sponsored by the National Cancer Institute (R01CA203999).

\* These studies used the same OSG for some or all of their research sample: Military Veteran Caregiver Network (MVCN).

**Table S2**

Demographic details extracted from included papers.

| <b>Paper</b>               | <b>Number of Participants</b>        | <b>Age of Participants</b>                            | <b>Gender</b>    | <b>Ethnicity</b>                                                | <b>Relationship to Cared-For Person<sup>1</sup></b>        | <b>Employment and Education<sup>2</sup></b>                                   |
|----------------------------|--------------------------------------|-------------------------------------------------------|------------------|-----------------------------------------------------------------|------------------------------------------------------------|-------------------------------------------------------------------------------|
| Andersson et al (2017)     | N = 9                                | Age range = 34-64 years                               | F = 9            | Not reported                                                    | Adult child = 7<br>Spouse = 1<br>Other = 4                 | 8 full-time employed;<br>2 university-level education                         |
| Andréasson et al (2017)    | N = 44                               | Age range not reported.<br>Mean age = 64.7 years      | F = 34<br>M = 10 | Not reported                                                    | Spouse = 30<br>Parent = 11<br>Other = 3                    | Mainly retired with higher-level education                                    |
| Benson et al (2020) +      | N = 58                               | Age range not reported.<br>Mean age = 56.54 years     | F = 47<br>M = 11 | Black/African American = 7<br>White/Caucasian = 49<br>Other = 2 | Spouse = 13<br>Parent = 7<br>Adult child = 29<br>Other = 9 | 21 with household income over \$70,000;<br>23 with university-level education |
| Clifford & Minnes (2012)   | N = 20                               | Age range = 33 to 53 years.<br>Mean age = 43 years    | F = 20           | Not provided                                                    | Parent = 20                                                | Median income = €83,000;<br>18 with university-level education                |
| Cole et al (2017)          | N = 6                                | Age range = 23-48 (5 participants only provided age). | F = 5<br>M = 1   | Black = 3<br>Indian = 3                                         | Parents = 6                                                | No reported                                                                   |
| Coulson & Greenwood (2012) | Analysis of messages on online group | N/A                                                   | N/A              | N/A                                                             | N/A                                                        | N/A                                                                           |
| Diefenbeck et al (2014)    | N = 11                               | Age range = 35-62.<br>Mean age = 49.36                | F = 10<br>M = 1  | White/Caucasian = 11                                            | Spouse = 3<br>Adult child = 5<br>Parent = 2<br>Other = 1   | All employed                                                                  |

<sup>1</sup> In some studies, participants were caring for more than one person, and so counts do not add up to sample size.

<sup>2</sup> Different studies reported different measures. Here we have summarized highest or median level of income, highest level of education or if caregivers were working.

|                            |                                      |                                                                       |                                 |                                                                 |                                                            |                                                                         |
|----------------------------|--------------------------------------|-----------------------------------------------------------------------|---------------------------------|-----------------------------------------------------------------|------------------------------------------------------------|-------------------------------------------------------------------------|
| Ferrell et al (2018)       | Analysis of messages on online group | N/A                                                                   | N/A                             | N/A                                                             | N/A                                                        | N/A                                                                     |
| Friedman et al (2018)*     | N = 242                              | Not reported                                                          | Not reported                    | Not reported                                                    | Not reported                                               | 96% employed                                                            |
| Ihring et al (2018)        | N = 83                               | Mean age = 53.7 years                                                 | F = 47<br>M = 36                | Not reported                                                    | Spouse = 27<br>Adult child = 26<br>Other = 30              | 51 higher-level education (A-levels)                                    |
| Knepper & Arrington (2016) | Analysis of messages on online group | N/A                                                                   | N/A                             | N/A                                                             | N/A                                                        | N/A                                                                     |
| Kruk (2015)                | Analysis of messages on online group | N/A                                                                   | N/A                             | N/A                                                             | N/A                                                        | N/A                                                                     |
| Male et al (2015)          | N = 25                               | Age range = 27-75 years.<br>Mean age = 51 years                       | F = 19<br>M = 6                 | Not reported                                                    | Spouse or partner = 19<br>Adult child = 5<br>Parent = 1    | Not reported                                                            |
| McKechnie et al (2014)     | N = 119                              | Age range = 22-86 years.<br>Mean age = 56 years                       | F = 99<br>M = 18<br>Missing = 2 | White British = 112<br>White other = 4<br>Other = 3             | Adult child = 67<br>Partner = 38<br>Other = 20             | 58 employed;<br>42 retired;<br>57 university- or higher-level education |
| Mohd Roffeei et al (2015)  | Analysis of messages on online group | N/A                                                                   | N/A                             | N/A                                                             | N/A                                                        | N/A                                                                     |
| Opreescu et al (2013)      | Analysis of messages on online group | N/A                                                                   | N/A                             | N/A                                                             | N/A                                                        | N/A                                                                     |
| Trail et al (2020)*        | N = 212                              | Age under 40 years = 124<br>Age 40-59 years = 74<br>Not provided = 14 | F = 199<br>M = 13               | Non-Hispanic white = 166<br>Hispanic = 23<br>Other = 23         | Spouse or partner = 189<br>Other = 23                      | Not reported                                                            |
| Washington et al (2018) +  | N = 58                               | Age range not reported.<br>Mean age = 56.54 years                     | F = 47<br>M = 11                | Black/African American = 7<br>White/Caucasian = 49<br>Other = 2 | Spouse = 13<br>Parent = 7<br>Adult child = 29<br>Other = 9 | 21 with household income over \$70,000;<br>23 with university-level     |

|                     |                                            |     |     |     |     |           |
|---------------------|--------------------------------------------|-----|-----|-----|-----|-----------|
|                     |                                            |     |     |     |     | education |
| Yoo et al<br>(2010) | Analysis of<br>messages on<br>online group | N/A | N/A | N/A | N/A | N/A       |

---

**Note:**

+ These studies used the data from the same randomized pragmatic trial sponsored by the National Cancer Institute (R01CA203999).

\* These studies used the same OSG for some or all of their research sample: Military Veteran Caregiver Network (MVCN).

**Table S3**

Data Extraction Table – Question 1: Types of online support groups and membership characteristics.

| <b>Paper</b>               | <b>Type of OSG</b>       | <b>Illness-Specific OSG</b>           | <b>Relationship to Cared-For Person</b> | <b>Type of Social Support</b>                                                                     |
|----------------------------|--------------------------|---------------------------------------|-----------------------------------------|---------------------------------------------------------------------------------------------------|
| Andersson et al (2017)     | Closed web network       | No, caregivers of older people        | Mixed                                   | Informational; emotional                                                                          |
| Andréasson et al (2017)    | Private text-based forum | No, caregivers of older people        | Mixed                                   | Informational; emotional                                                                          |
| Benson et al (2020)        | Private SNS group        | Yes                                   | Mixed                                   | Emotional                                                                                         |
| Clifford & Minnes (2012)   | Private text-based forum | Yes                                   | Mixed                                   | Social connection; informational support                                                          |
| Cole et al (2017)          | Messaging app            | Yes                                   | Mixed                                   | Skill acquisition; emotional support; informational support                                       |
| Coulson & Greenwood (2012) | Public text-based forum  | Yes                                   | Mixed                                   | Emotional and informational                                                                       |
| Diefenbeck et al (2014)    | Closed web network       | Yes                                   | Mixed                                   | 9 therapeutic factors present: Top 3 are Group Cohesiveness, Catharsis, and Imparting Information |
| Ferrell et al (2018)       | Public text-based forum  | Yes                                   | Mixed                                   | Emotional support; informational support                                                          |
| Friedman et al (2018)      | Private text-based forum | No, caregivers of military personnel. | Mixed                                   | Seeking relief from caregiver burden – higher level of burden more likely to engage               |



|                            |                          |                                      |  |         |                                                                                          |
|----------------------------|--------------------------|--------------------------------------|--|---------|------------------------------------------------------------------------------------------|
| Ihring et al (2018)        | Public text-based forum  | Yes                                  |  | Mixed   | Informational support, relief from feelings of uncertainty                               |
| Knepper & Arrington (2016) | Email forum              | Yes                                  |  | Parents | Informational support; emotional support                                                 |
| Kruk (2015)                | Public text-based forum  | Yes                                  |  | Mixed   | Emotional support; informational support                                                 |
| Male et al (2015)          | Private text-based forum | Yes                                  |  | Mixed   | Breaking social isolation; emotional support                                             |
| McKechnie et al (2014)     | Public text-based forum  | Yes                                  |  | Mixed   | Social similarity; informational support; emotional support                              |
| Mohd Roffeei et al (2015)  | Public SNS Group         | Yes                                  |  | Parents | Informational support; emotional support; network support; esteem                        |
| Oprescu et al (2013)       | Public text-based forum  | Yes                                  |  | Parents | Informational support; emotional support                                                 |
| Trail et al (2020)         | Private text-based forum | No, caregivers of military personnel |  | Mixed   | Breaking social isolation                                                                |
| Washington et al (2018)    | Private SNS group        | Yes                                  |  | Mixed   | Informational or educational support                                                     |
| Yoo et al (2010)           | Public text-based forum  | Yes                                  |  | Mixed   | Korean caregivers seeking emotional support; US caregivers seeking informational support |

---

**Table S4**

Data Extraction Table – Question 2: What are the communication mediums and characteristics of these online support groups (OSG)?

| <b>Paper</b>               | <b>Type of Communication</b> | <b>Type of Moderation</b>    | <b>Primary Mode of Communication</b> | <b>Anonymity Level</b>                           | <b>Group Duration</b>                                                                        |
|----------------------------|------------------------------|------------------------------|--------------------------------------|--------------------------------------------------|----------------------------------------------------------------------------------------------|
| Andersson et al (2017)     | Asynchronous                 | Professional, Trained        | Text based                           | Registered users                                 | No limit                                                                                     |
| Andréasson et al (2017)    | Asynchronous                 | Professional, Trained        | Text based                           | Not stated                                       | Unclear – seems ongoing                                                                      |
| Benson et al (2020)        | Asynchronous                 | Professional, Trained        | Text based                           | Registered Facebook account                      | Unclear – person would be removed from group following brief transition period once bereaved |
| Clifford & Minnes (2012)   | Synchronous                  | Professional, Trained        | Text based                           | Pseudonymous                                     |                                                                                              |
| Cole et al (2017)          | Asynchronous                 | Professional, Trained        | Text based                           | None – participants known to each other in group | No limit – research participants had used group for 6 months or longer                       |
| Coulson & Greenwood (2012) | Asynchronous                 | Not specified                | Text based                           | Not stated - Public forum                        | No limit                                                                                     |
| Diefenbeck et al (2014)    | Asynchronous                 | Peer, Trained                | Text based                           | Pseudonymous                                     | 16 weeks                                                                                     |
| Ferrell et al (2018)       | Asynchronous                 | Mix of peer and professional | Text based                           | Not stated – public website with global reach    | No limit                                                                                     |
| Friedman et al (2018)      | Asynchronous                 | Mix of peer and professional | Text based                           | Registered users                                 | Had joined group 6 months previously – no limit on duration of group membership              |
| Ihring et al (2018)        | Asynchronous                 | Professional, Trained        | Text based                           | Registered users                                 | No limit                                                                                     |

|                            |              |                       |            |                                                    |                                                                                              |
|----------------------------|--------------|-----------------------|------------|----------------------------------------------------|----------------------------------------------------------------------------------------------|
| Knepper & Arrington (2016) | Asynchronous | Peer                  | Text based | Anonymous                                          | No limit                                                                                     |
| Kruk (2015)                | Asynchronous | Peer                  | Text based | Not stated – public website                        | No limit                                                                                     |
| Male et al (2015)          | Synchronous  | Professional, Trained | Video      | Registered users                                   | 9 or 10 weeks                                                                                |
| McKechnie et al (2014)     | Asynchronous | Peer                  | Text-based | Registered users                                   | No limit – research participants had joined the group 12 weeks prior.                        |
| Mohd Roffeei et al (2015)  | Asynchronous | Peer                  | Text based | Registered Facebook account                        | No limit                                                                                     |
| Opreescu et al (2013)      | Asynchronous | Peer                  | Text based | Not stated – public website with global membership | No limit                                                                                     |
| Trail et al (2020)         | Asynchronous | Professional, Trained | Text based | Registered users                                   | Had joined group 6 months previously – no limit on duration of group membership              |
| Washington et al (2018)    | Asynchronous | Professional, Trained | Text based | Registered Facebook account                        | Unclear – person would be removed from group following brief transition period once bereaved |
| Yoo et al (2010)           | Asynchronous | Not specified         | Text based | Not stated – public Alzheimer forum                | No limit                                                                                     |

---

**Table S5**

**Key elements of categories**

| <b>Category Name</b>                               | <b>Key Elements</b>                                                                                                                                                                                                                                                                                                               |
|----------------------------------------------------|-----------------------------------------------------------------------------------------------------------------------------------------------------------------------------------------------------------------------------------------------------------------------------------------------------------------------------------|
| <b>Category 1: Safe Communication</b>              | The group needs to be experienced as safe and supportive to build social support.                                                                                                                                                                                                                                                 |
| Sub-Category                                       |                                                                                                                                                                                                                                                                                                                                   |
| Reciprocal Disclosure                              | <ul style="list-style-type: none"><li>• Self-disclosure of information and emotions</li><li>• Patterns of engagement for eliciting and giving support</li><li>• Giving support as helpful as receiving</li></ul>                                                                                                                  |
| Shared Lived Experience                            | <ul style="list-style-type: none"><li>• Personal narratives</li><li>• Second stories</li><li>• Emotional support in comments</li><li>• Use of non-verbal tools</li><li>• Exchange of learnt knowledge and experience</li></ul>                                                                                                    |
| Non-Judgmental Space                               | <ul style="list-style-type: none"><li>• Expressions that would normally be stigmatized</li><li>• Second stories</li><li>• Exploration of identity</li><li>• Importance of similar others—experience, not demographics, key factor of similarity</li><li>• Importance of closeness of relationship with cared for person</li></ul> |
| <b>Category 2: Engagement and Group Management</b> | Conditions necessary to enable social support to be built and positive experiences of group.                                                                                                                                                                                                                                      |
| Sub-Categories                                     |                                                                                                                                                                                                                                                                                                                                   |
| Facilitation/Moderation                            | <ul style="list-style-type: none"><li>• Use of relevant professionals beneficial</li><li>• Active role needed in developing group cohesion</li><li>• Create tone, culture, and safety in group</li><li>• Encourage engagement—responding to posts</li><li>• Monitor content</li></ul>                                             |
| Tone of Group                                      | <ul style="list-style-type: none"><li>• Low engagement protective action against negative tone of group</li><li>• Low engagement protective action against emotional impact of group content</li></ul>                                                                                                                            |
| Structure of Group                                 | <ul style="list-style-type: none"><li>• Flexibility main benefit of online format</li><li>• OSG relieves social isolation</li><li>• Asynchronous format encouraged engagement</li></ul>                                                                                                                                           |

- Real or perceived anonymity encouraged disclosures
  - Privacy extremely important
  - No clear definition of engagement
-

**Table S6**

Summary of recommendations from the studies.

| Paper                      | Recommendations: Actions to be Taken                                                                                                                                                                                                                                                                                                                                                                                            |
|----------------------------|---------------------------------------------------------------------------------------------------------------------------------------------------------------------------------------------------------------------------------------------------------------------------------------------------------------------------------------------------------------------------------------------------------------------------------|
| Andersson et al (2017)     | 1) Web-based interventions must be offered early in the caregiving process.<br>2) Support functions need to be adaptable over the course of the caring trajectory.<br>3) Support must be offered in a way that will provide most assistance for the support to be experienced as meaningful.                                                                                                                                    |
| Andréasson et al (2017)    | 4) Include concepts of caregiver identity.<br>5) Recognize caregiver knowledge, capacity, and life situation.<br>6) Cultural change within health and social care systems and practices to recognize and support carer contributions.                                                                                                                                                                                           |
| Benson et al (2020)        | 7) Use monitoring feature on Facebook to pre-approve content for accuracy and appropriateness before publication.<br>8) Strategies needed to strengthen relationships and increase interactions among group members – develop companionship support.                                                                                                                                                                            |
| Clifford & Minnes (2012)*  | 9) Ensure facilitator is experienced and comfortable working with group.<br>10) Ensure able to think quickly to intervene during sessions.<br>11) Clearly outline format and expectations at beginning of group.<br>12) Find ways to encourage regular attendance.<br>13) Encourage participants to take a role in deciding focus and direction of the group.<br>14) Encourage development of relationships among participants. |
| Cole et al (2017)          | 15) Group needs rules, parameters, and defined roles to keep group focused on objective of group.                                                                                                                                                                                                                                                                                                                               |
| Coulson & Greenwood (2012) | 16) Need mechanism to review actions of moderators to ensure they are appropriately meeting duties (eg, facilitating exchange of personal details between members).                                                                                                                                                                                                                                                             |
| Diefenbeck et al (2014)    | 17) Facilitator may need to be trained in group therapy.<br>18) Facilitator may need to emphasize member-to-member interactions.<br>19) Strategies need to be taken to support group cohesion.<br>20) Consider how OSG can be developed to meet heterogenous groups (demographically, caregiving intensity, relationship to cared-for person etc.).                                                                             |
| Ferrell et al (2018)       | 21) Design materials based on caregiver needs.<br>22) Services that provide supports for patients (PTSD in this case) should                                                                                                                                                                                                                                                                                                    |

consider incorporating a peer support group for caregivers.

- |                          |                                                                                                                                                                                                                                                                                                                                                                                                                                                                                                                                                                                                                                                                                                                                                                                                                                                                                                                                       |
|--------------------------|---------------------------------------------------------------------------------------------------------------------------------------------------------------------------------------------------------------------------------------------------------------------------------------------------------------------------------------------------------------------------------------------------------------------------------------------------------------------------------------------------------------------------------------------------------------------------------------------------------------------------------------------------------------------------------------------------------------------------------------------------------------------------------------------------------------------------------------------------------------------------------------------------------------------------------------|
| Friedman et al (2018)    | 23) Target group to meet needs of the profiles of caregivers most likely to use the service.<br>24) Tailor system to support adaptive processes, such as interruptions and multi-tasking due to caregiving demands.                                                                                                                                                                                                                                                                                                                                                                                                                                                                                                                                                                                                                                                                                                                   |
| Ihring et al (2018)      | 25) Physicians should be aware of OSG.                                                                                                                                                                                                                                                                                                                                                                                                                                                                                                                                                                                                                                                                                                                                                                                                                                                                                                |
| Male et al (2015)        | 26) Develop counselling program or workshops to improve communication between caregivers and their loved ones navigating change in circumstances.                                                                                                                                                                                                                                                                                                                                                                                                                                                                                                                                                                                                                                                                                                                                                                                     |
| Oprescu et al (2013)     | 27) Tailor messaging for audiences, targeted messaging                                                                                                                                                                                                                                                                                                                                                                                                                                                                                                                                                                                                                                                                                                                                                                                                                                                                                |
| Washington et al (2018)* | 28) Designers of OSG tools should address the context of use and the needs and expectations of the target audience in system design.<br>29) Consider how appropriate new tool is to family caregivers—should not require extensive training and should be flexible—usability considerations when selecting and implementing OSG systems.<br>30) Healthcare teams offering OSG for family caregivers should ensure that group facilitators regularly monitor group activity, striving to balance the sharing and validation of difficult life experiences with content that is inspirational and uplifting.<br>31) Capitalize on existing behaviour patterns and offer OSG via popular social media platforms—may be able to serve more caregivers—need to address privacy and security concerns.<br>32) Effective support group facilitation requires an approach that is responsive to ever-changing group composition and dynamics. |
| Yoo et al (2010)         | 33) Practitioners, when they communicate with caregivers, should be extensively familiar with their characteristics, especially in terms of the primary negative emotions that they are experiencing.                                                                                                                                                                                                                                                                                                                                                                                                                                                                                                                                                                                                                                                                                                                                 |

**Note:**

\* These articles had dedicated sections of recommendations for practitioners. For the remainder of the articles, information was extracted from the discussion and conclusion sections.
